# Supplementary material for: Synthesis, Biological Evaluation and Molecular Docking of Certain Sulfones as Potential Nonazole Antifungal Agents
Source: PubMed Central journal article supplement (PMC6274496; doi:10.3390/molecules21010114), 2016-01-20
Supplement: molecules-21-00114-s001.pdf [file molecules-21-00114-s001.pdf]

# Supplementary Materials: Synthesis, Biological Evaluation and Molecular Docking of Certain Sulfones as Potential Nonazole Antifungal Agents

Mohamed Fares, Mohamed A. Said, Muhammad A. Alsherbiny, Radwa A. Eladwy, Hadia Almahli, Marwa M. Abdel-Aziz, Hazem A. Ghabbour, Wagdy M. Eldehna and Hatem A. Abdel-Aziz

**X-ray crystallographic analysis:** Crystal of compound **3** was obtained by slow evaporation from solution of ethanol/DMF. The measurements of the crystal were performed on a Bruker SMART APEX II D8 Venture diffractometer with graphite-monochromated Cu  $K\alpha$  radiation ( $\lambda = 1.54178 \text{ \AA}$ ) at 293 K. The structure was solved by direct method and refined with SHELXTL. E-maps provided the positions of all the non-H-atoms. The full-matrix least-squares refinement was carried out on  $F^2$ 's using anisotropic temperature factors for all non-H-atoms. Crystallographic data for the structure reported in this paper have been deposited at the Cambridge Crystallographic Data Center and allocated with the deposition number: CCDC 1430111.

**Table S1.** Crystallographic data and refinements for compound **3**.

| <b>Crystal data</b>              |                                                                        |
|----------------------------------|------------------------------------------------------------------------|
| $C_{14}H_{11}ClO_3S$             | $V = 1292.27 (8) \text{ \AA}^3$                                        |
| $M_r = 294.74$                   | $Z = 4$                                                                |
| Monoclinic, $P2_1/c$             | Cu $K\alpha$ radiation                                                 |
| $a = 5.7258 (2) \text{ \AA}$     | $\mu = 4.14 \text{ mm}^{-1}$                                           |
| $b = 9.1203 (4) \text{ \AA}$     | $T = 293 \text{ K}$                                                    |
| $c = 25.0426 (8) \text{ \AA}$    | $0.50 \times 0.11 \times 0.07 \text{ mm}$                              |
| $\beta = 98.824 (3)^\circ$       | $F(000) = 608$                                                         |
| <b>Data collection</b>           |                                                                        |
| CCD area detector diffractometer | $R_{\text{int}} = 0.104$                                               |
| 7841 measured reflections        | $\theta_{\text{max}} = 62.5^\circ$                                     |
| 2021 independent reflections     | 775 reflections with $I > 2\sigma(I)$                                  |
| <b>Refinement</b>                |                                                                        |
| $R[F^2 > 2\sigma(F^2)] = 0.103$  | 0 restraints                                                           |
| $wR(F^2) = 0.311$                | H atoms treated by a mixture of independent and constrained refinement |
| $S = 0.92$                       | $w = 1/[\sigma^2(F_o) + (0.1895P)^2]$ where $P = (F_o^2 + 2F_c^2)/3$   |
| 2021 reflections                 | $\Delta Q_{\text{max}} = 0.49 \text{ e} \cdot \text{\AA}^{-3}$         |
| 173 parameters                   | $\Delta Q_{\text{min}} = -0.58 \text{ e} \cdot \text{\AA}^{-3}$        |

The crystallographic structure of **3** is represented in Figure 2. The single crystal X-ray study on this derivative unambiguously defines the exact structure. Crystal packing of **3** which showed the intermolecular hydrogen bond C10—H10A...O2 is presented in Figure 3. The crystallographic data and refinement for the crystal was presented in Table S1. Selected geometric parameters of compound **3** presented in Table S2 (Supplementary Materials). Hydrogen-bond geometry of **3** is illustrated in Table S3.

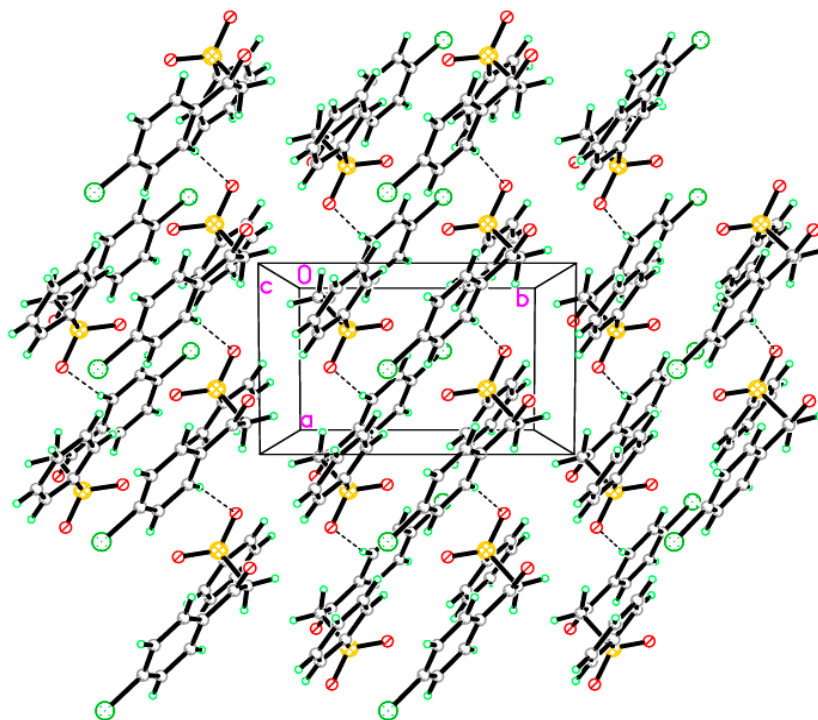

**Figure S1.** Crystal packing of **3** showing intermolecular hydrogen bonds as dashed lines.

**Table S2.** Selected geometric parameters (Å, °) for compound **3**.

| <b>Bond distance</b> |           |             |            |
|----------------------|-----------|-------------|------------|
| Cl1—C12              | 1.738 (9) | S1—C6       | 1.753 (8)  |
| S1—O1                | 1.416 (5) | S1—C7       | 1.767 (8)  |
| S1—O2                | 1.446 (7) | O3—C8       | 1.218 (11) |
| <b>Bond angle</b>    |           |             |            |
| O1—S1—O2             | 118.7 (3) | S1—C6—C5    | 120.5 (7)  |
| O1—S1—C6             | 109.5 (3) | S1—C7—C8    | 110.3 (6)  |
| O1—S1—C7             | 107.3 (3) | O3—C8—C7    | 117.4 (7)  |
| O2—S1—C6             | 108.7 (4) | O3—C8—C9    | 122.7 (7)  |
| O2—S1—C7             | 107.7 (3) | Cl1—C12—C11 | 119.9 (7)  |
| C6—S1—C7             | 103.9 (4) | Cl1—C12—C13 | 118.6 (7)  |
| S1—C6—C1             | 118.9 (6) |             |            |

**Table S3.** Hydrogen-bond geometry (Å, °) of **3**.

| <i>D</i> —H... <i>A</i>    | <i>D</i> —H | <i>H</i> ... <i>A</i> | <i>D</i> ... <i>A</i> | <i>D</i> —H... <i>A</i> |
|----------------------------|-------------|-----------------------|-----------------------|-------------------------|
| C10—H10A...O2 <sup>i</sup> | 0.9300      | 2.5000                | 3.403 (10)            | 163.00                  |

Symmetry codes: (i)  $x + 1, y, z$ .
